# Supplementary material for: A simple “molecular beacon”-based fluorescent sensing strategy for sensitive and selective detection of mercury (ii)
Source: Royal Society of Chemistry journal article supplement (doi:10.1039/c1cc14265h), 2011-01-01
Supplement: c1cc14265h.pdf [file c1cc14265h.pdf]

## Supporting Information

### Experiment section

#### Chemicals

The DNA oligonucleotides were obtained from Shanghai Sangon Biological Engineering Technology & Services Co., Ltd. of China. The sequences of oligonucleotides are as follows:

MB: FAM-5' CAGTCT **GGGTCGTGATGTG** AGACTG 3'- DABCYL

Mismatched ssDNA-1: 5' - CACATCTCGACCC-3'

Mismatched ssDNA-2: 5' - CACATCTCGTCCC-3'

Mismatched ssDNA-3: 5' - CACTTCTCGTCCC-3'

Mismatched ssDNA-4: 5' - CTCTTCTCGTCCC-3'

The stem-loop oligonucleotide is modified with a carboxyfluorescein (FAM) dye at the 5' end and a quencher 4-(4-dimethylaminophenylazo) benzoic acid (DABCYL) at the 3' end, respectively. It can form the stem-loop structure at an appropriate ionic strength. The part (in bold) is the loop of MB. Mismatched ssDNA-1, -2, -3 and -4 have different numbers T-T mismatched base pairs (numbers are 1, 2, 3 and 4, respectively, in underline), which can't match with the loop of MB.

All solutions were prepared by using metal free reagents and water was purified with Milli Q purification system (Millipore). DNA buffer solutions (the concentration of oligonucleotides is 10  $\mu$ M) were prepared as the stock solutions by dissolving oligonucleotides into 40 mM Tris-acetate buffer solutions containing 0.1M NaCl and 0.05 M MgCl<sub>2</sub> (pH 7.4) (except for the ionic strength optimized experiment).

23 All chemicals used were analytical grade or better. The  $\text{Hg}(\text{NO}_3)_2$  stock solution  
24 ( $1.0 \times 10^{-3}$  M) was prepared with 2 or 3 drops of concentrated nitric acid. Other metal  
25 ion solutions were prepared from nitrate salts.

### 26 *Apparatus*

27 The fluorescence measurements were performed at room temperature on a Varian  
28 Cary Eclipse Fluorescence Spectrophotometer except specific indication. The  
29 emission spectra were collected from 500 to 600 nm with the excitation wavelength of  
30 480 nm. Both the excitation and emission slit widths were set to 10.0 nm.

### 31 *Assay of $\text{Hg}^{2+}$*

32 Above stock solutions of MB and mismatched ssDNA were diluted to 100 nM by  
33 Tris-acetate (pH 7.4), respectively. The equal volume (150  $\mu\text{l}$  for each) solutions of  
34 MB and mismatched ssDNA were mixed each other. Before fluorescence  
35 measurements, aliquots of  $\text{Hg}^{2+}$  aqueous were added into above mixture at 37 $^\circ\text{C}$  for 50  
36 min (except for the temperature and time-course study). The final volume is 300  $\mu\text{l}$ .  
37 Then the fluorescence was measured for excitation at 480 nm and the emission spectra  
38 were collected from 500 to 600 nm. Maximum fluorescence intensity value was used  
39 for quantification. (Note: Due to the high toxicity of  $\text{Hg}^{2+}$ , after assays the solutions  
40 should be discarded following the waste disposal procedure.)

41

42

43

44

45

46

47

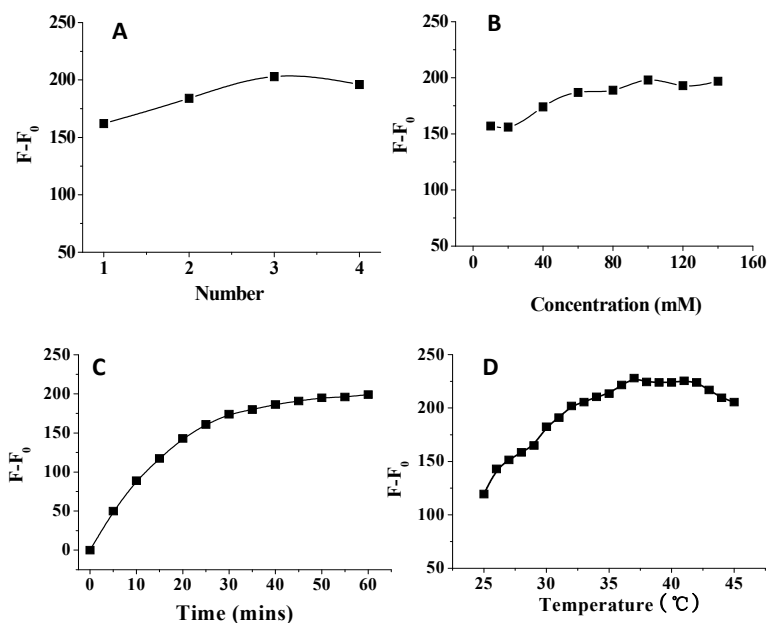

48

49 **Figure S1** Optimization of the measuring system. Influence of: (A) the number of  
50 unmatched T residues; (B) the concentration of NaCl; (C) incubation time; (D)  
51 incubation temperature.  $F$  and  $F_0$  are the fluorescence intensity with and without  
52  $2 \times 10^{-7}$  M  $\text{Hg}^{2+}$  ions, respectively. Other conditions were the same as those described  
53 in Figure 2.

54

55

56

57

58

59

60 **Table 1** Determination of Hg<sup>2+</sup> ions in water samples using the proposed method

|          | Added(nM) | Founded(nM) ( mean <sup>a</sup> ± SD <sup>b</sup> ) | Recovery (%) |
|----------|-----------|-----------------------------------------------------|--------------|
| Sample 1 | 10        | 10.9±0.5                                            | 109          |
| Sample 2 | 25        | 24.1±0.8                                            | 96.4         |
| Sample 3 | 50        | 51.2±8                                              | 102.2        |
| Sample 4 | 75        | 78.4±5                                              | 104.5        |
| Sample 5 | 100       | 93.4±12                                             | 93.4         |
| Sample 6 | 150       | 148±10                                              | 98.6         |

61 <sup>a</sup> Mean of three determinations.

62 <sup>b</sup> SD, standard deviation.

63
